# Supplementary material for: Methoxy-Substituted Tyramine Derivatives Synthesis, Computational Studies and Tyrosinase Inhibitory Kinetics
Source: MDPI journal article supplement (doi:10.3390/molecules26092477), 2021-04-23
Supplement: s1 [file s1]

## Compound Ph2:

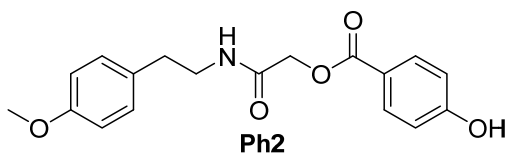

### 1. <sup>1</sup>H NMR

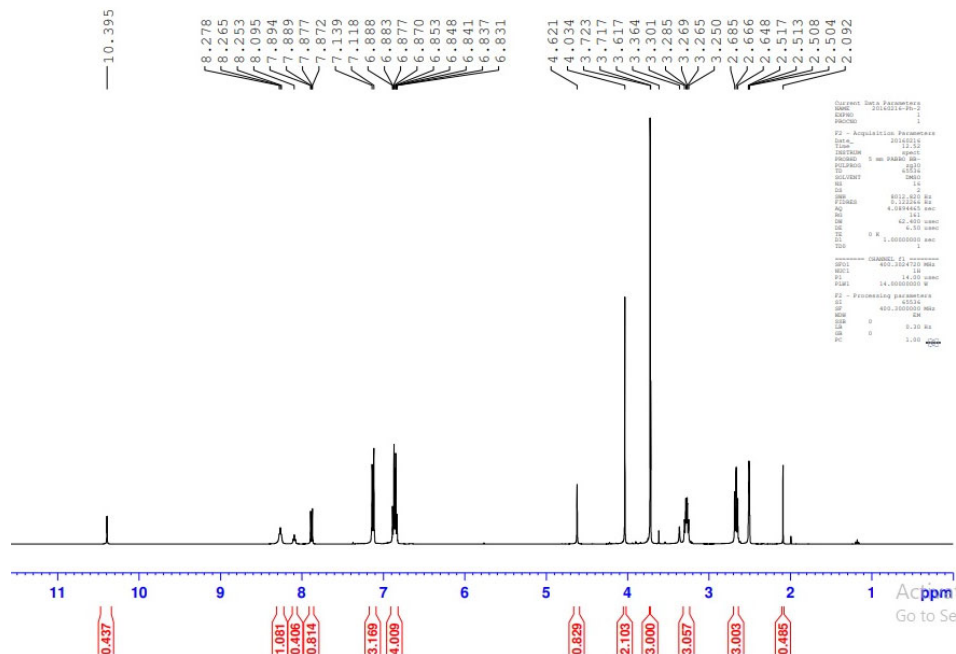

### 2. <sup>13</sup>C NMR

Ph-2-C

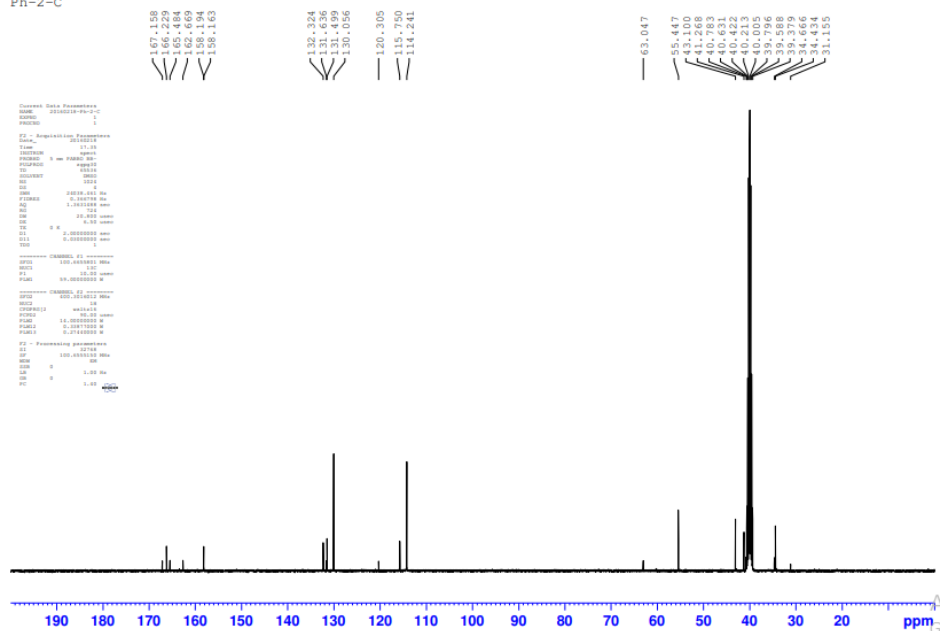

Figure S2. <sup>1</sup>H, <sup>13</sup>C NMR spectra of compound Ph2

### Compound Ph3:

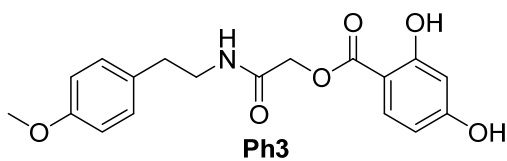

## 1. $^1\text{H}$ NMR

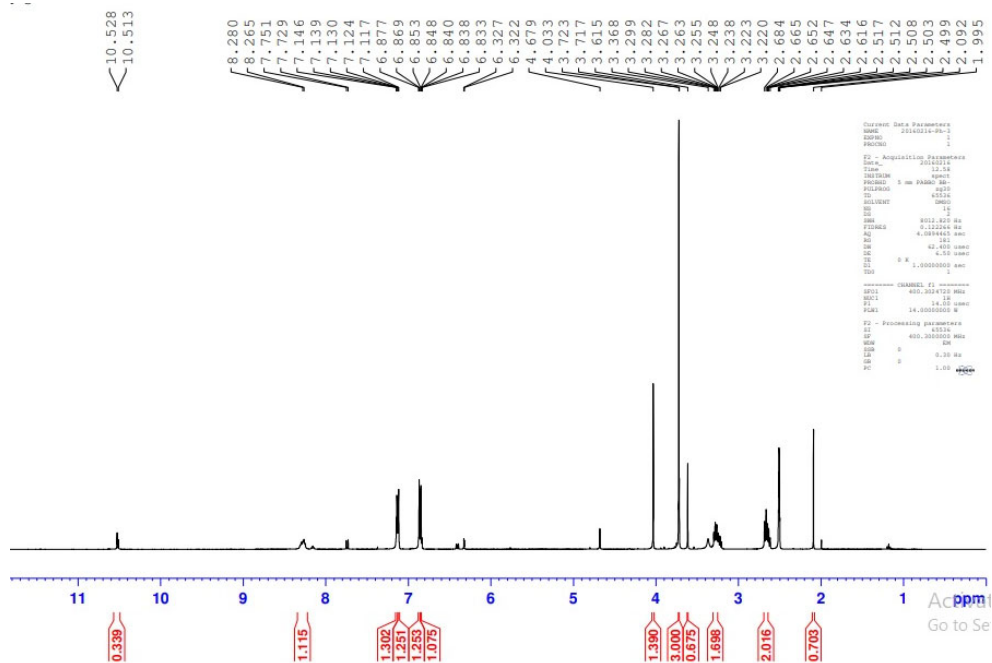

## 2. $^{13}\text{C}$ NMR

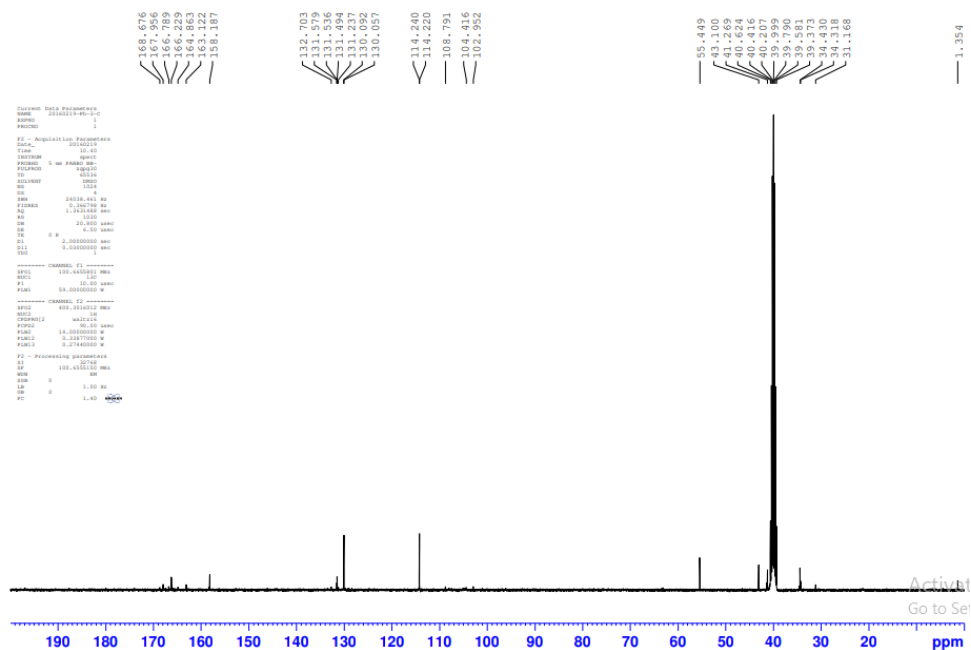

Figure S3.  $^1\text{H}$ ,  $^{13}\text{C}$  NMR spectra of compound Ph3

### Compound Ph4:

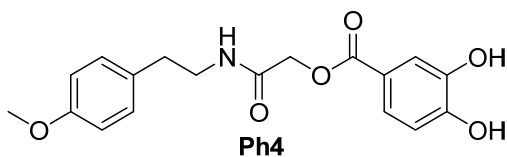

## 1. $^1\text{H}$ NMR

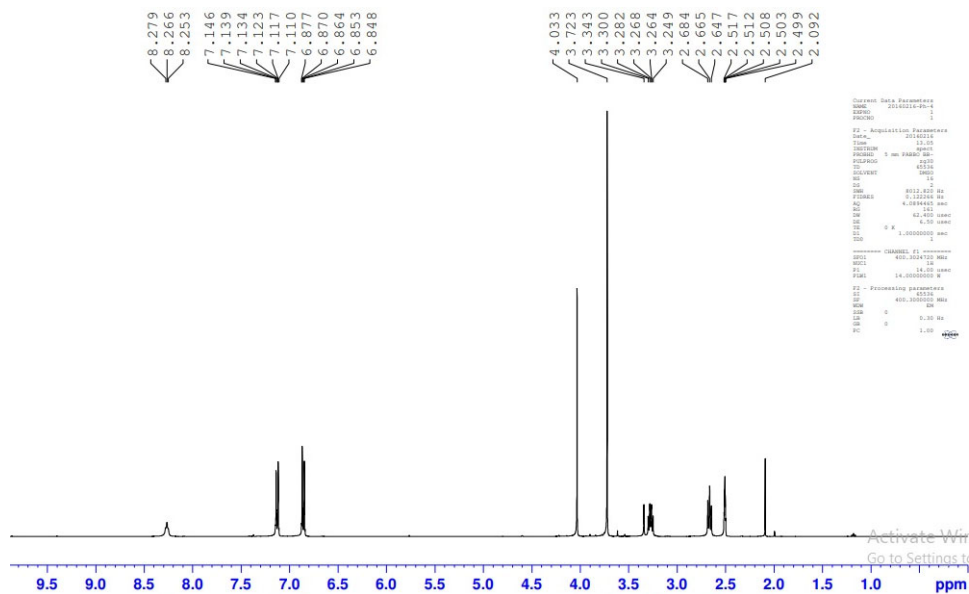

## 2. $^{13}\text{C}$ NMR

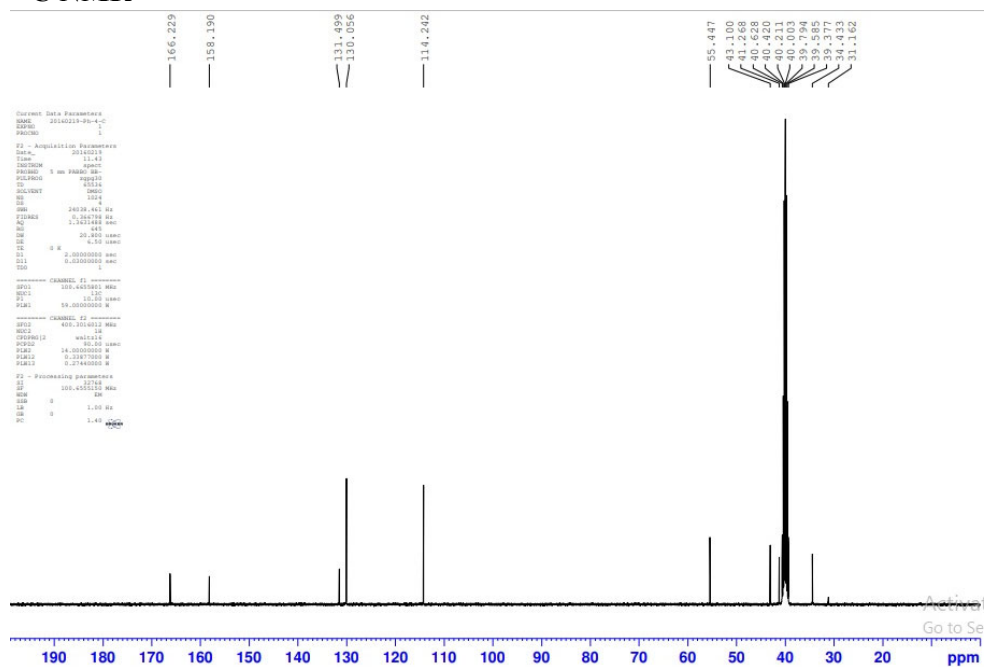

Figure S4.  $^1\text{H}$ ,  $^{13}\text{C}$  NMR spectra of compound Ph4

## Compound Ph5:

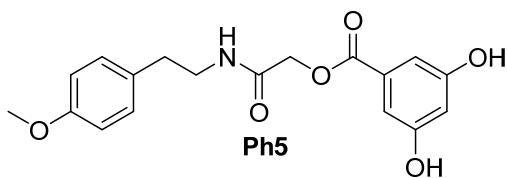

### 1. <sup>1</sup>H NMR

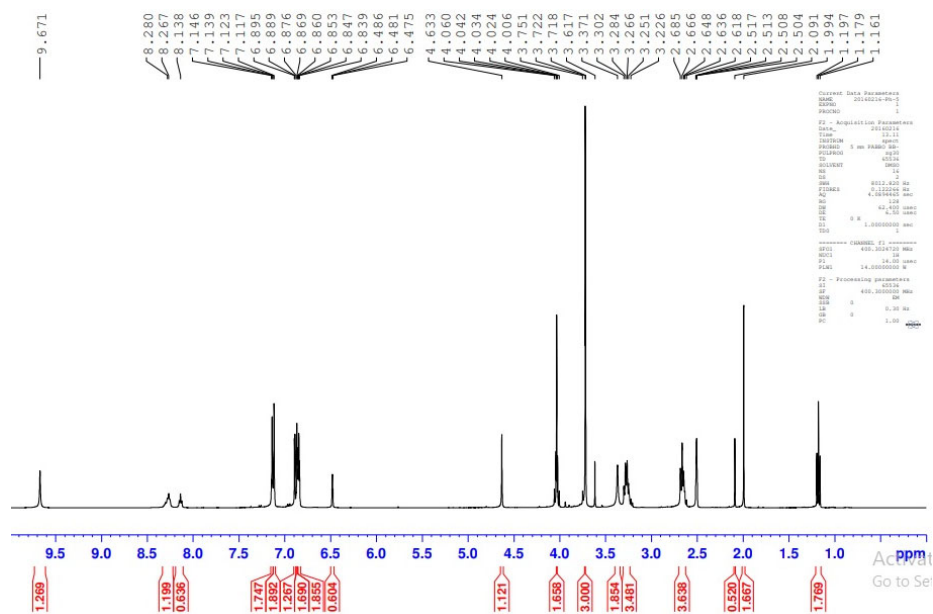

### 2. <sup>13</sup>C NMR

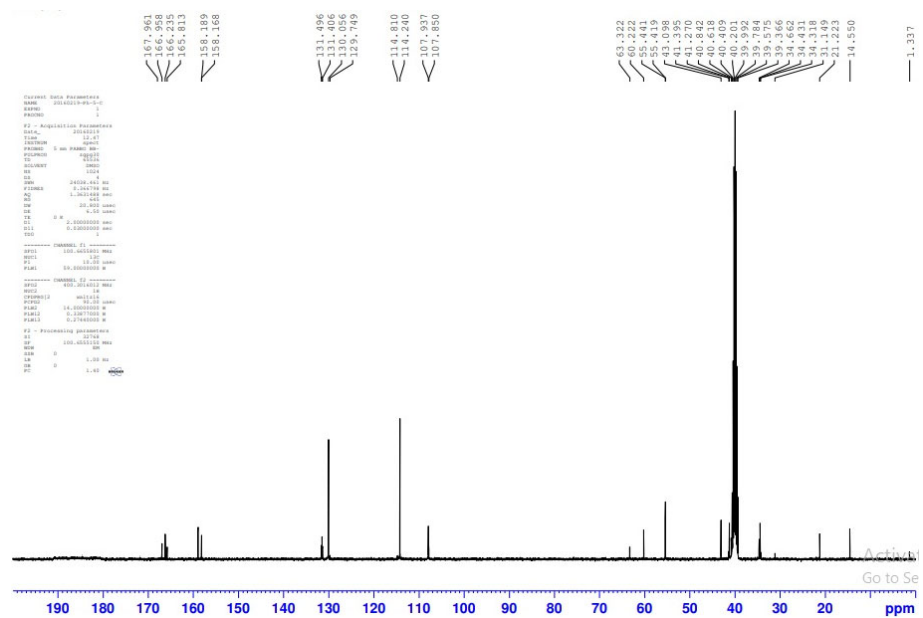

Figure S5. <sup>1</sup>H, <sup>13</sup>C NMR spectra of compound Ph5

**Compound Ph6:**

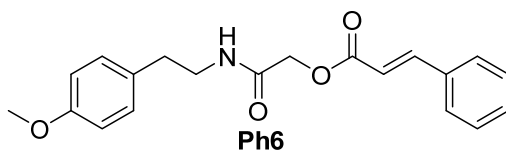

## 1. $^1\text{H}$ NMR

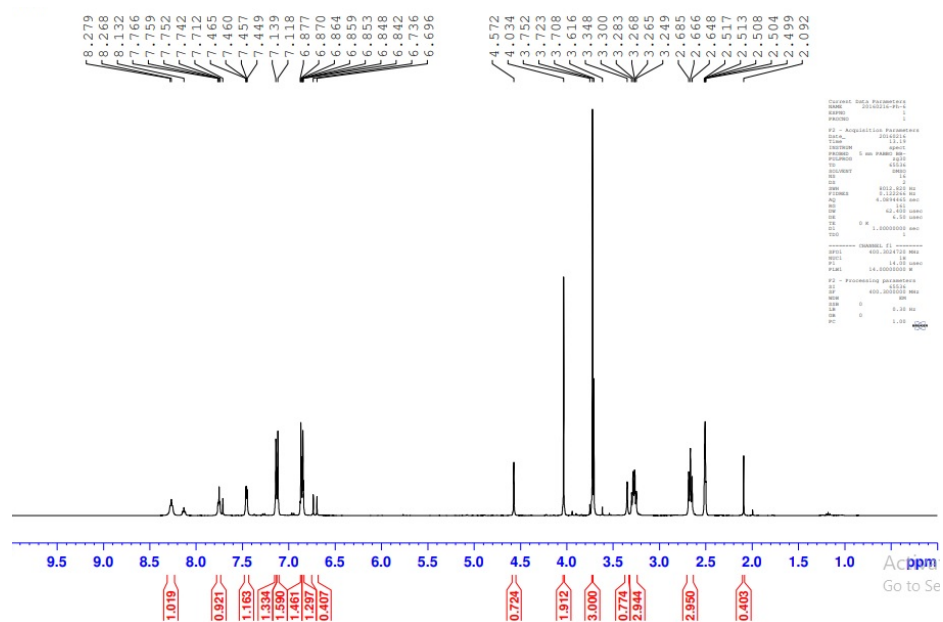

## 2. $^{13}\text{C}$ NMR

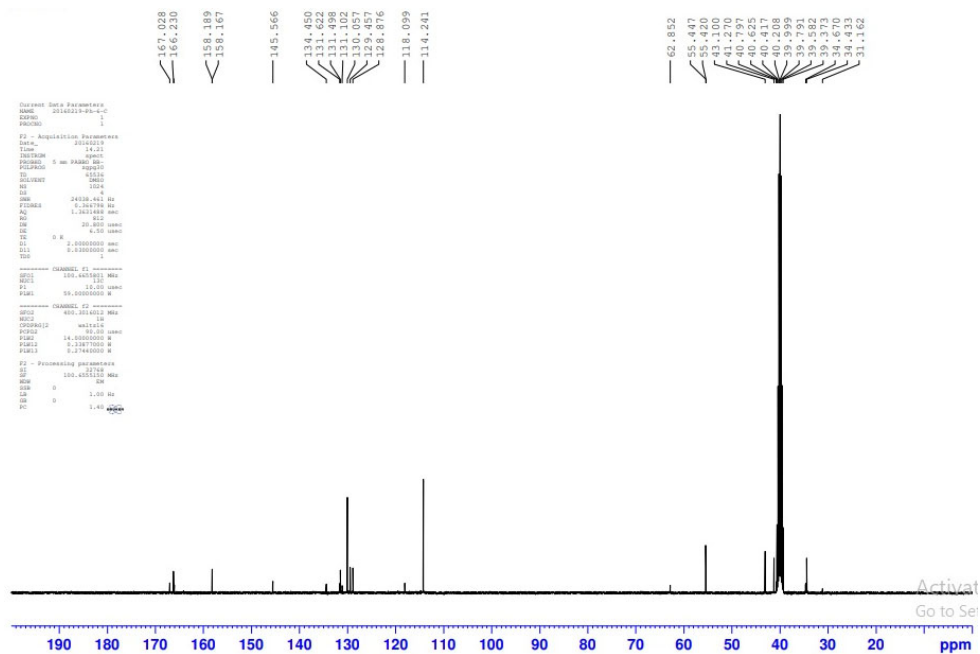

Figure S6.  $^1\text{H}$ ,  $^{13}\text{C}$  NMR spectra of compound Ph6

## Compound Ph7:

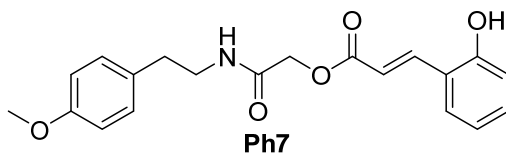

### 1. <sup>1</sup>H NMR

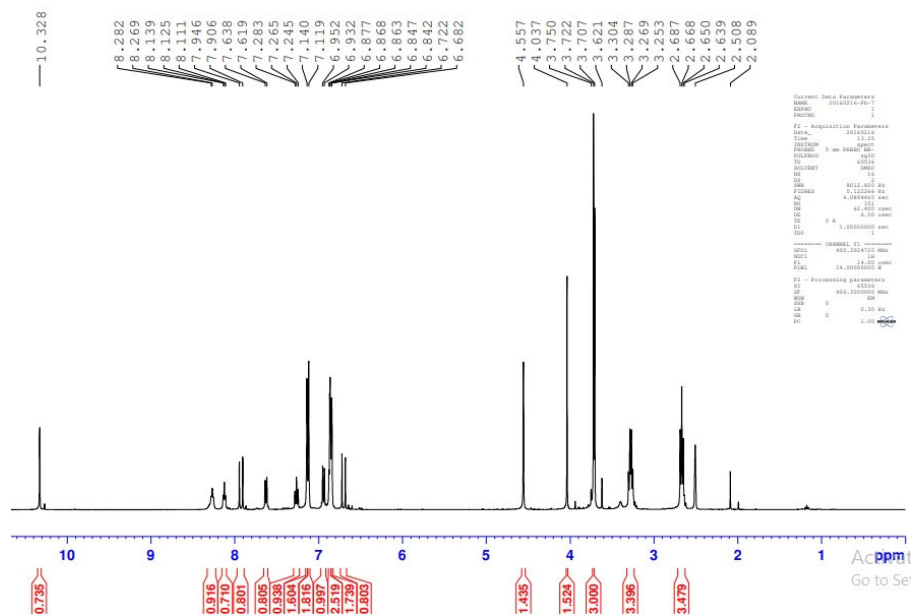

### 2. <sup>13</sup>C NMR

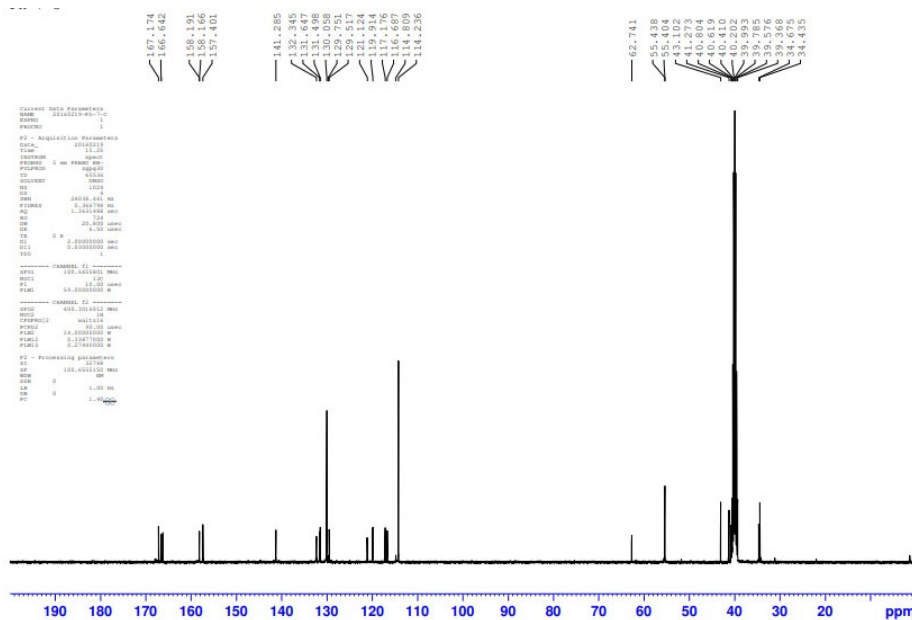

Figure S7. <sup>1</sup>H, <sup>13</sup>C NMR spectra of compound Ph7

**Compound Ph8:**

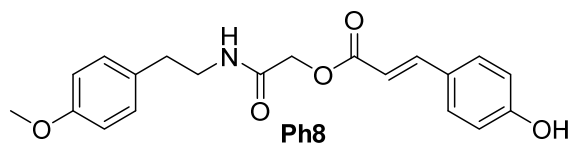

## 1. $^1\text{H}$ NMR

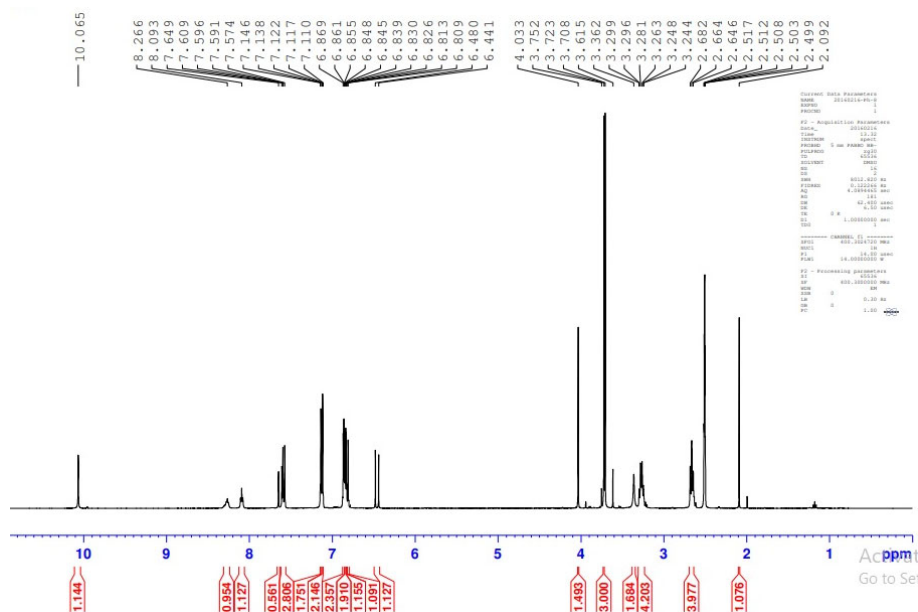

## 2. $^{13}\text{C}$ NMR

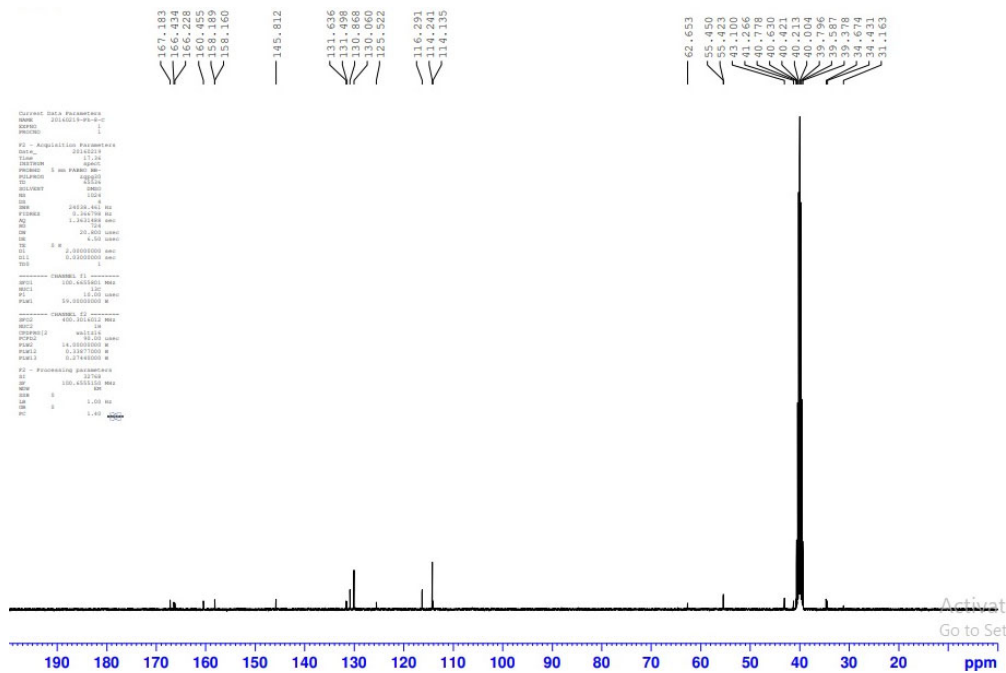

Figure S8.  $^1\text{H}$ ,  $^{13}\text{C}$  NMR spectra of compound Ph8

COc1ccc(cc1)CCNC(=O)COCC(=O)/C=C/c2cc(O)cc(O)c2[illegible][illegible]

9

## Compound Ph10:

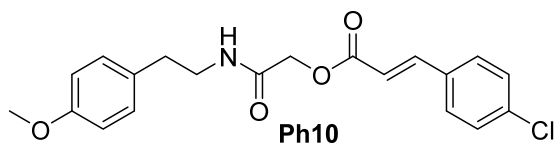

### 1. <sup>1</sup>H NMR

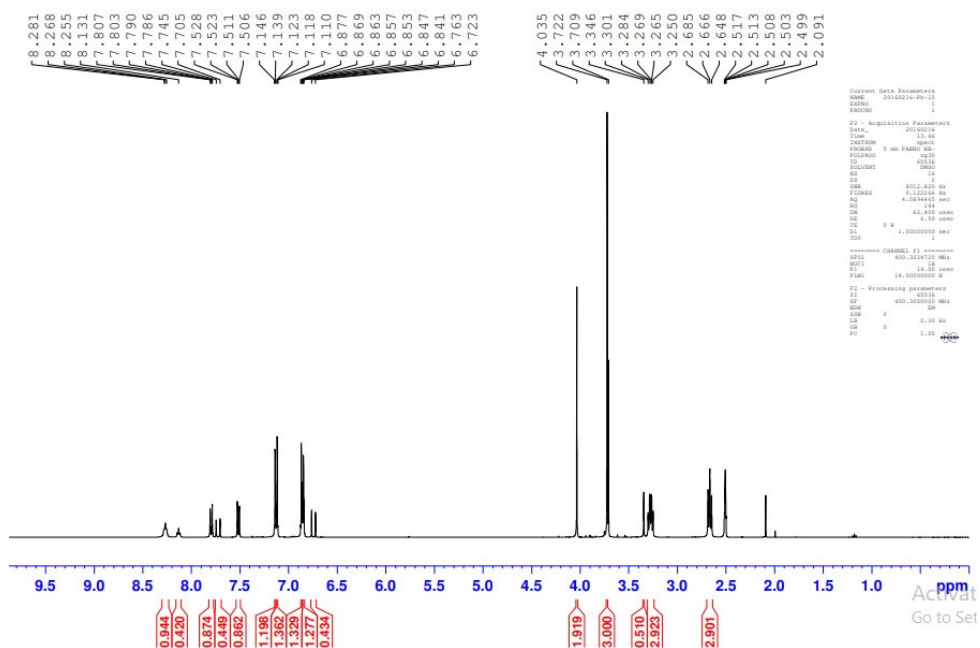

### 2. <sup>13</sup>C NMR

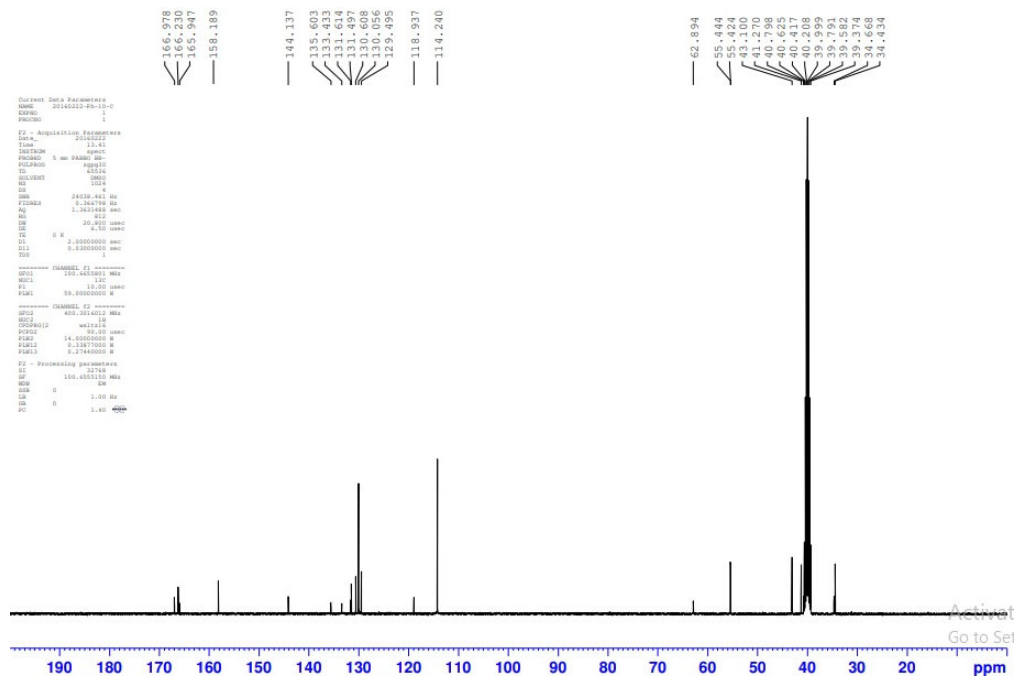

Figure S10. <sup>1</sup>H, <sup>13</sup>C NMR spectra of compound Ph10
